# Supplementary material
Source: PubMed Central journal article supplement (PMC10063339)

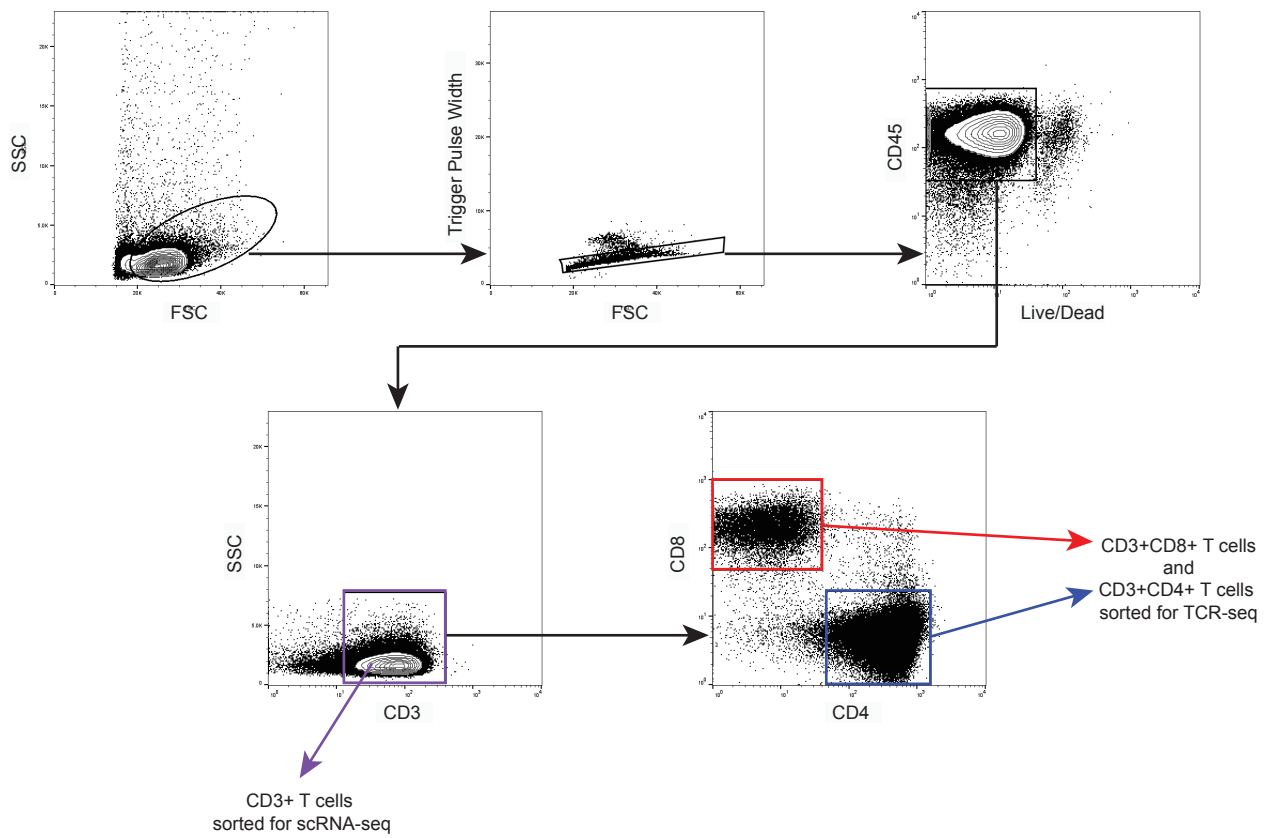

**Supplementary Figure 1.** Gating strategy for T cell isolation by FACS.

Supplement: NIHMS1860919-supplement-1860919_Sup_Fig_1.pdf [file NIHMS1860919-supplement-1860919_Sup_Fig_1.pdf]
